# Supplementary material for: An Accurate and Effective Method for Measuring Osimertinib by UPLC-TOF-MS and Its Pharmacokinetic Study in Rats
Source: MDPI journal article supplement (doi:10.3390/molecules23112894), 2018-11-06
Supplement: s1 [file s1]

A Area:  $4.6e^7$  Height:  $1.0e^7$

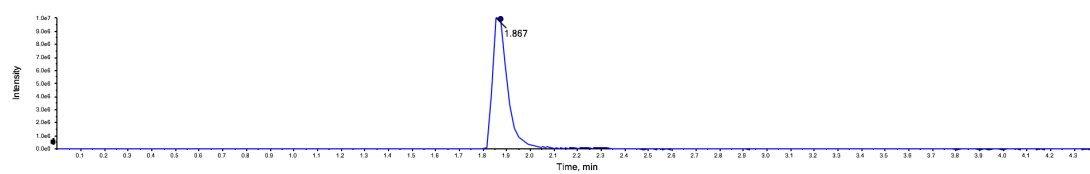

B Area:  $1.3e^6$  Height:  $2.1e^5$

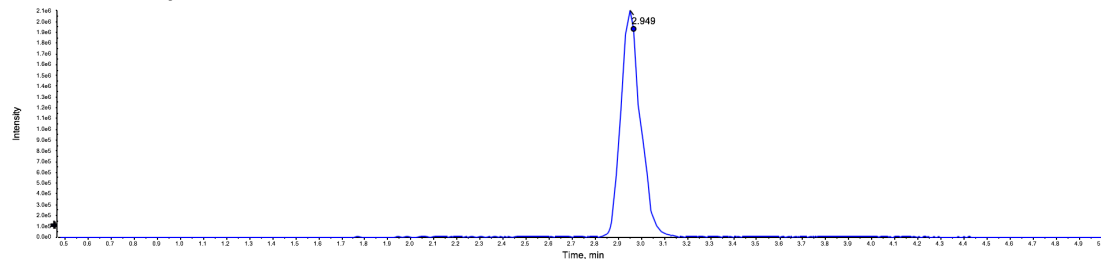

C Area:  $6.8e^5$  Height:  $1.1e^5$

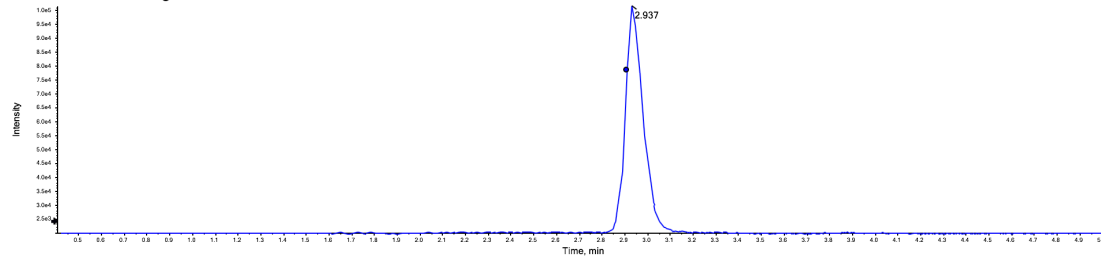

D Area:  $6.6e^4$  Height:  $1.1e^4$

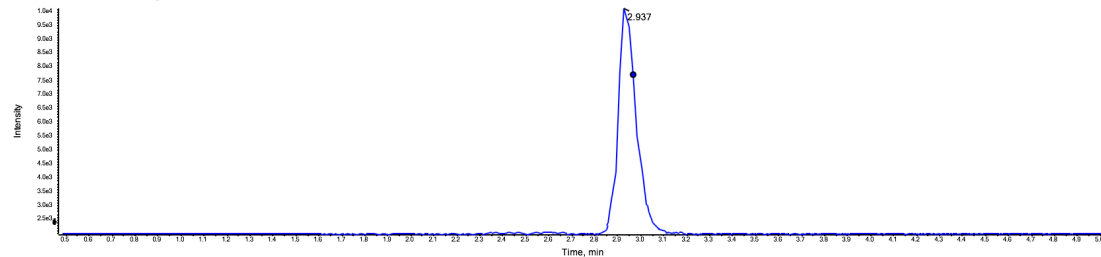

E Area:  $3.3e^4$  Height:  $6.1e^3$

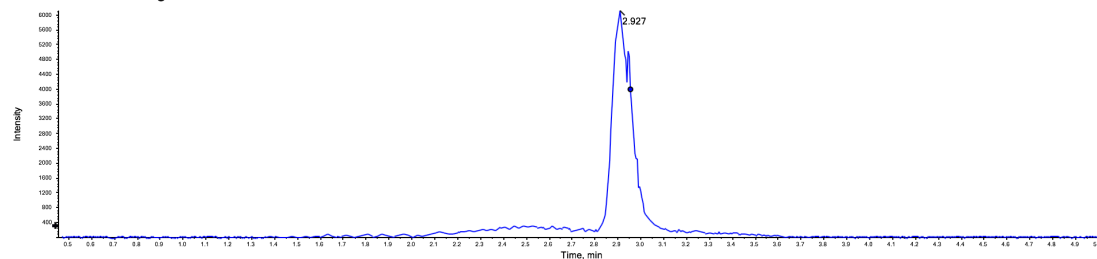

| Number | Concentration (ng/mL) | Area     | Height   |
|--------|-----------------------|----------|----------|
| A      | 500                   | $4.6e^7$ | $1.0e^7$ |
| B      | 400                   | $1.3e^7$ | $2.1e^6$ |
| C      | 20                    | $6.8e^5$ | $1.1e^5$ |

|   |   |       |       |
|---|---|-------|-------|
| D | 2 | 6.6e4 | 1.1e4 |
| E | 1 | 3.3e4 | 6.1e3 |

---
