# Supplementary material for: An Accurate and Effective Method for Measuring Osimertinib by UPLC-TOF-MS and Its Pharmacokinetic Study in Rats
Source: MDPI journal article supplement (doi:10.3390/molecules23112894), 2018-11-06
Supplement: s1 [file s1]

# 1 Supplement 1

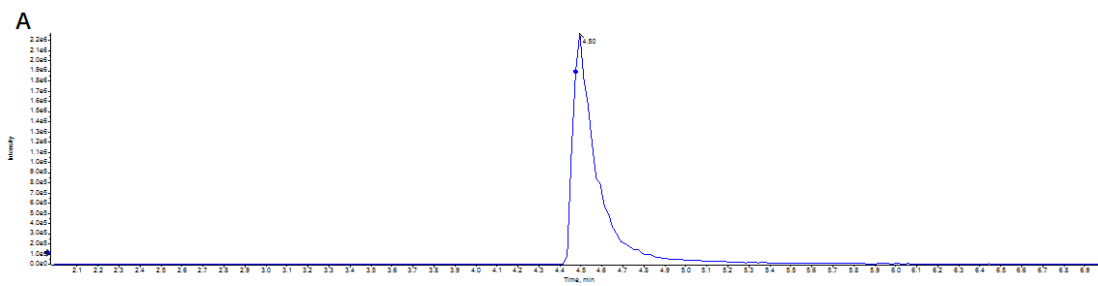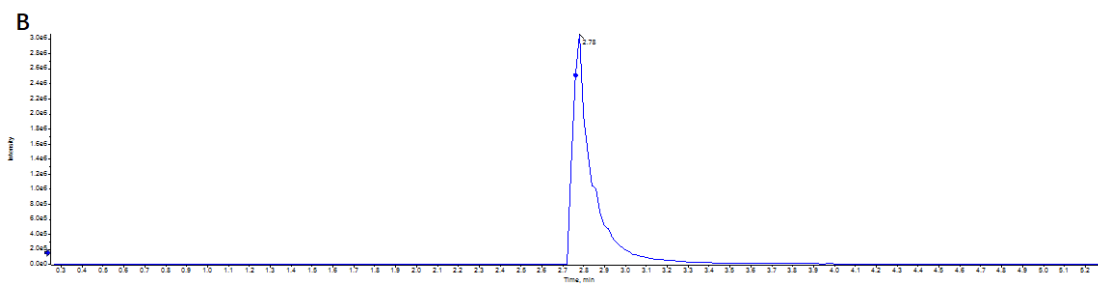

(A) Chromatographic peak of osimertinib under 0.1% formic acid water and acetonitrile, and (B) Chromatographic peak of osimertinib under 0.1% formic acid-ammonia formate water and acetonitrile.
